# Supplementary material for: Pervasive nuclear envelope ruptures precede ECM signaling and disease onset without activating cGAS-STING in Lamin-cardiomyopathy mice
Source: PubMed Central journal article supplement — Cell Rep. Author manuscript; Available in PMC 2024 Jul 31. (PMC11290591; doi:10.1016/j.celrep.2024.114284), 2024-05-29
Supplement: NIHMS2005220-supplement-1.pdf [file NIHMS2005220-supplement-1.pdf]

Cell Reports, Volume 43

## Supplemental information

### **Pervasive nuclear envelope ruptures precede ECM signaling and disease onset without activating cGAS-STING in Lamin-cardiomyopathy mice**

**Atsuki En, Hanumakumar Bogireddi, Briana Thomas, Alexis V. Stutzman, Sachie Ikegami, Brigitte LaForest, Omar Almakki, Peter Pytel, Ivan P. Moskowitz, and Kohta Ikegami**

## SUPPLEMENTARY FIGURE S1

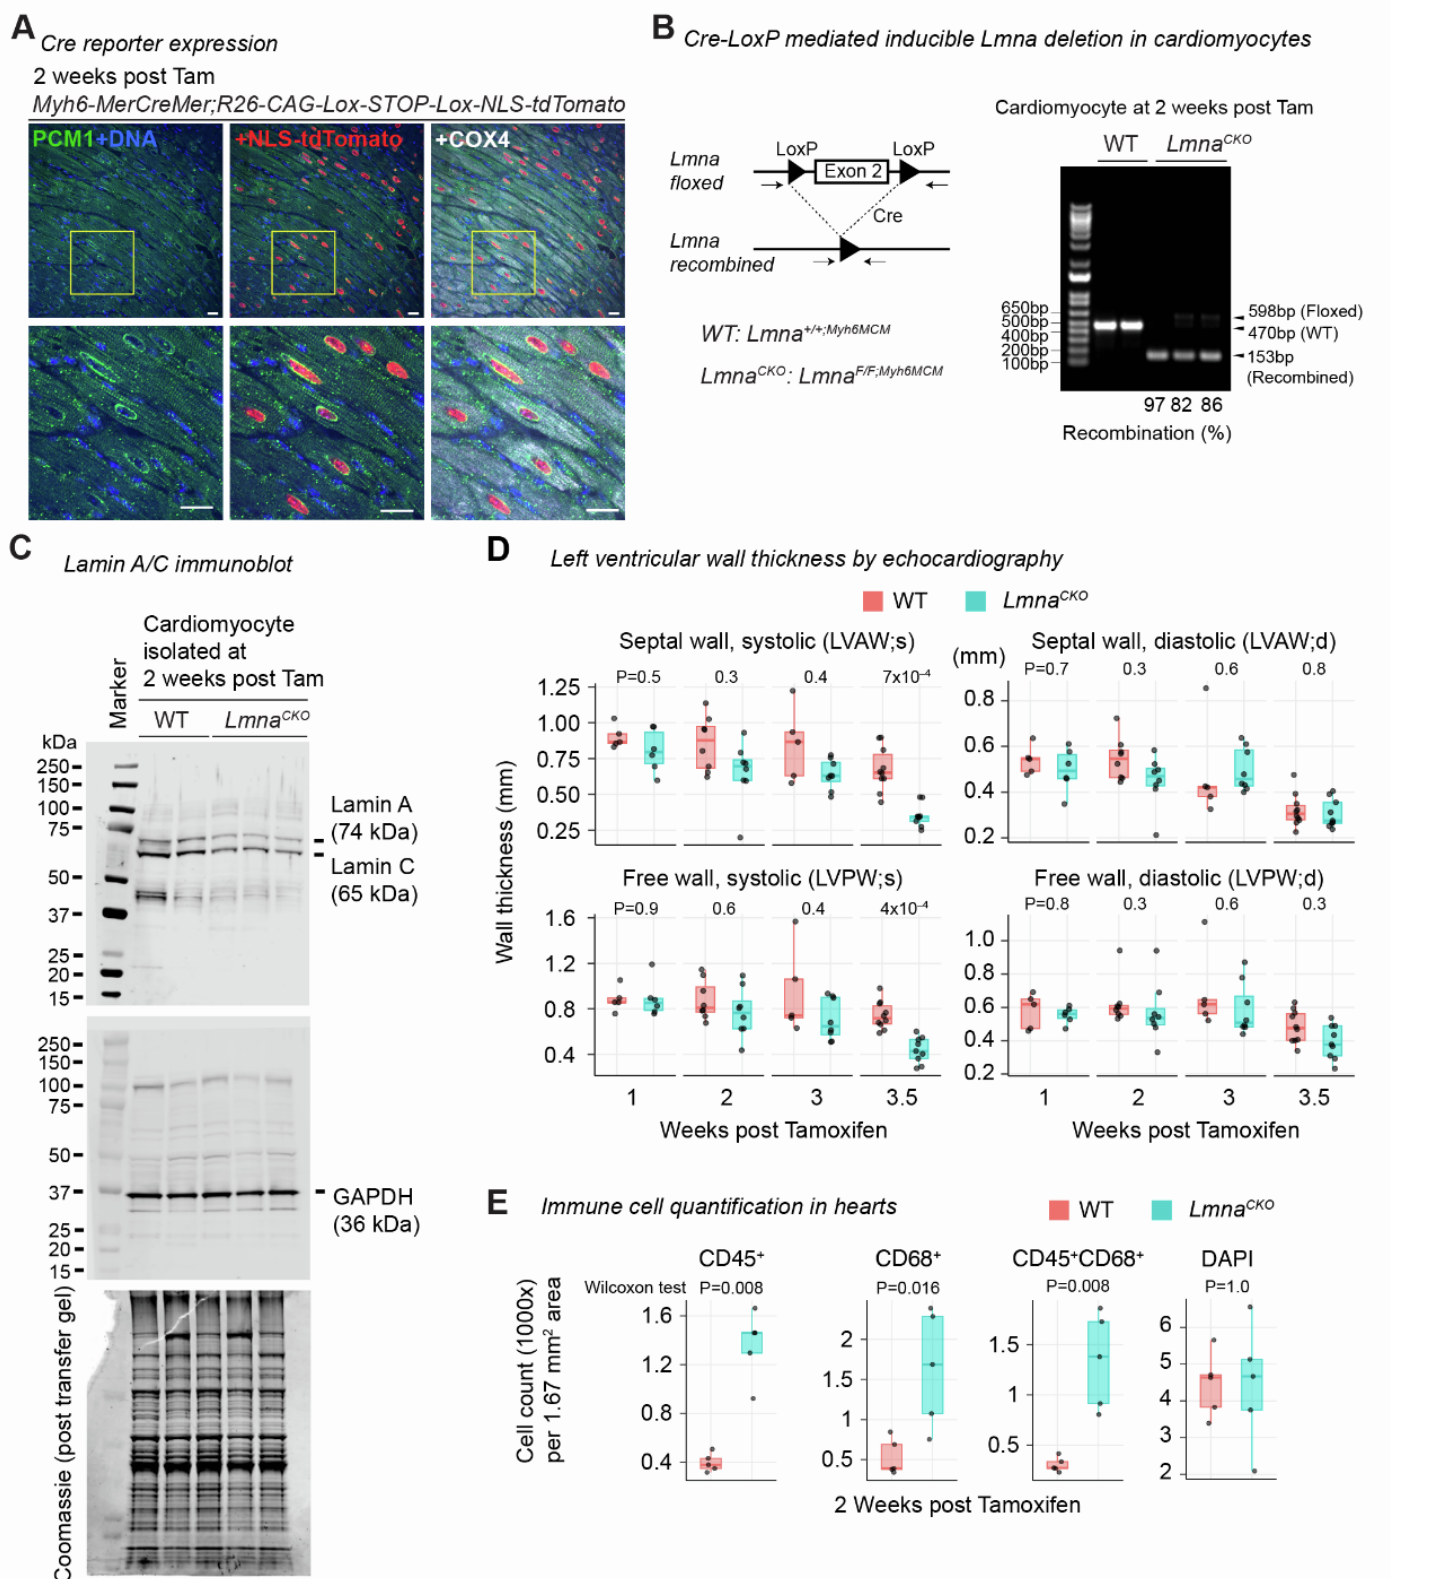

**Figure S1. Characterization of adult mice with cardiomyocyte-specific *Lmna* deletion**

**A**) Validation of cardiomyocyte-specific *Cre* activity conferred by the *Myh6-MerCreMer* transgene. The *Cre* reporter is R26-CAG-LSL-NLS-tdTomato. Heart sections are stained with NLS-tdTomato, PCM1, and COX4 immunofluorescence. PCM1 and COX4 stain cardiomyocytes. Scale bar: 20  $\mu$ m.

**B**) Left: Schematic for the *Lmna* *LoxP* allele and the expected recombined allele upon *Cre* expression. Arrow, PCR primer location. Right: Amplification of the wild-type, floxed, and recombined *Lmna* alleles by PCR using

primers indicated in the left panel. The recombination efficiency (%) was calculated by the intensity of the 153-bp recombined band relative to that of the 598-bp floxed band. WT n=2, *Lmna*<sup>CKO</sup> n=3.

**C)** The whole immunoblot for **Fig. 1B**, with Coomassie staining of the original gel.

**D)** Echocardiography of left ventricular (LV) geometry. n=5-10 mice/genotype. P-value, Wilcoxon test.

**E)** Quantification of CD45 and CD68-positive cells in heart sections. Representative image in **Fig. 1J**. n=5 mice/genotype. P-value, same as **D**.

## SUPPLEMENTARY FIGURE S2

### A Additional images for EM in hearts

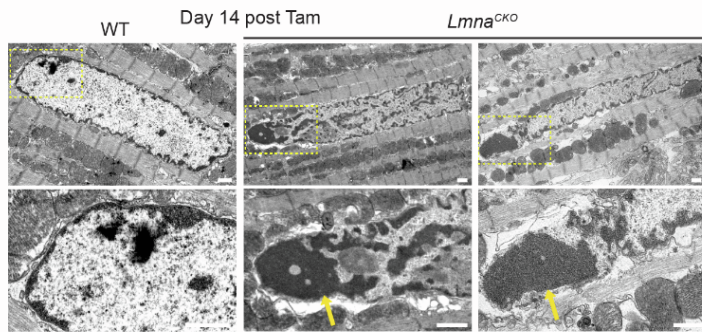

### B Additional images for NLS-TdTomato signals in *Lmna*<sup>CKO</sup> CMs

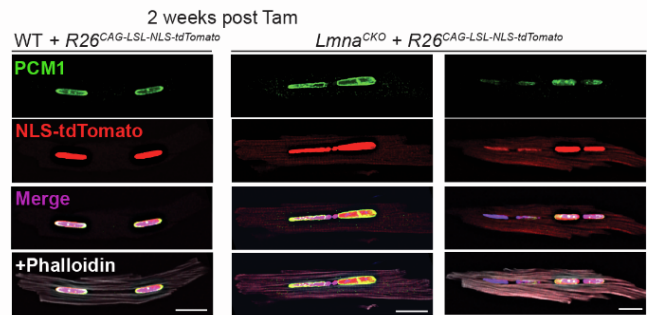

### C Localization of cytoplasmic DNA sensor GFP-icGAS in isolated cardiomyocytes

WT + AAV-GFP-icGAS 2 weeks post Tam

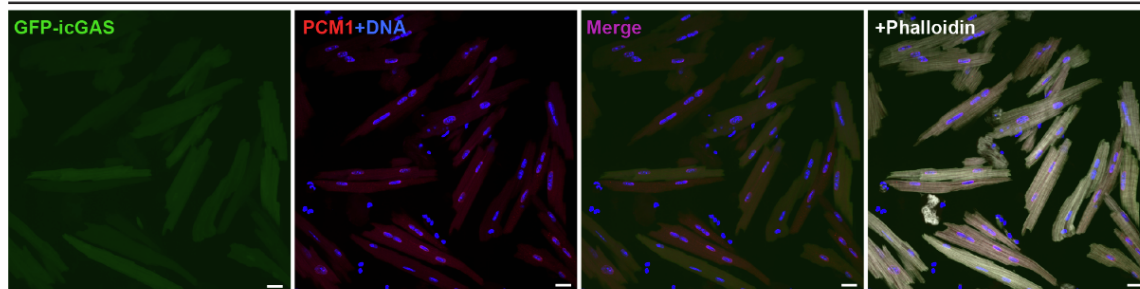

*Lmna*<sup>CKO</sup> + AAV-GFP-icGAS 2 weeks post Tam

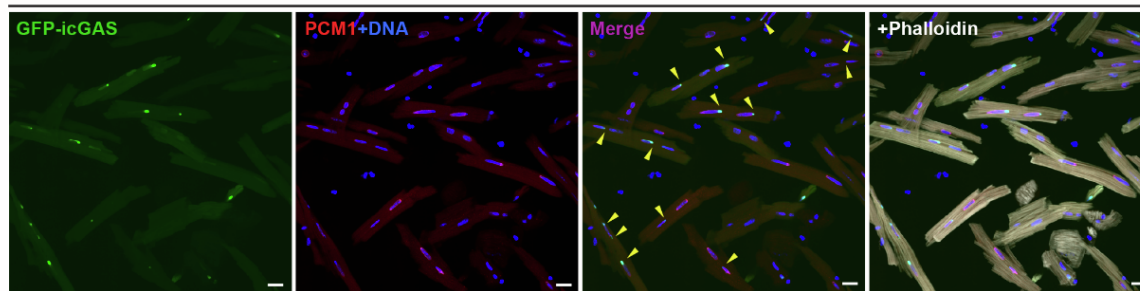

### D PCM1 IF in CMs at Day 11 post Tam

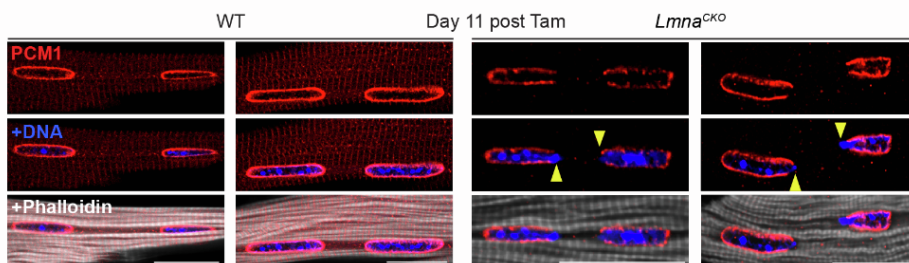

### E Number of nuclei with DNA protrusion from PCM1-lost nuclear tips per cell

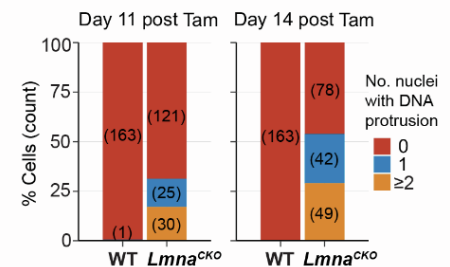

### F $\gamma$ -H2AX IF in heart

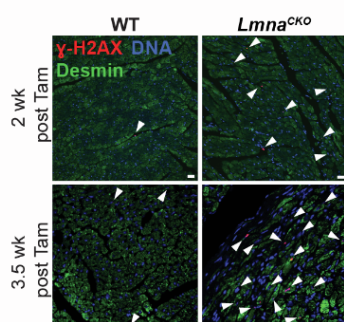

### G TUNEL assay in heart section

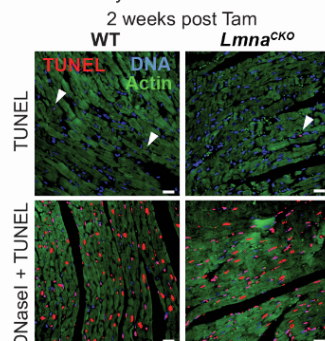

**Figure S2. Characterization of nuclear envelope ruptures in *Lmna*<sup>CKO</sup> cardiomyocytes**

**A)** Top: Additional transmission electron micrographs of heart sections focusing on cardiomyocytes, related to **Fig. 2B**. Bottom: Enlarged images of the area indicated by yellow box in the upper panels. Arrow, protruded chromatin. Scale bar: 1  $\mu$ m.

**B)** Additional immunofluorescence images for PCM-1 with detection of native NLS-tdTomato. Scale bar: 20  $\mu$ m.

**C)** Immunofluorescence for PCM-1 with detection of exogenous GFP-icGAS in isolated cardiomyocytes, related to **Fig. 2H**. Phalloidin stains F-actin. Arrowhead, GFP-icGAS localization at nuclear tips. Scale bar: 20  $\mu$ m.

**D)** Immunofluorescence images for PCM1 in isolated cardiomyocytes at Day 11 post tamoxifen. Arrowhead, local loss of PCM1 at nuclear tips. Scale bar: 20  $\mu$ m.

**E)** Fraction of cardiomyocytes with DNA protrusion from PCM1-lost nuclear tips. Cardiomyocytes are stratified by the number of ruptured nuclei per cell. Only multinucleated cardiomyocytes are analyzed.

**F)** Immunofluorescence for  $\gamma$ H2AX and desmin in heart tissue sections. Desmin stains cardiomyocytes. Arrowhead,  $\gamma$ H2AX-stained nuclei. Scale bar: 20  $\mu$ m.

**G)** TUNEL assay for cell death detection in heart tissues. Arrowhead, TUNEL-positive cells. Scale bar: 20  $\mu$ m.

## SUPPLEMENTARY FIGURE S3

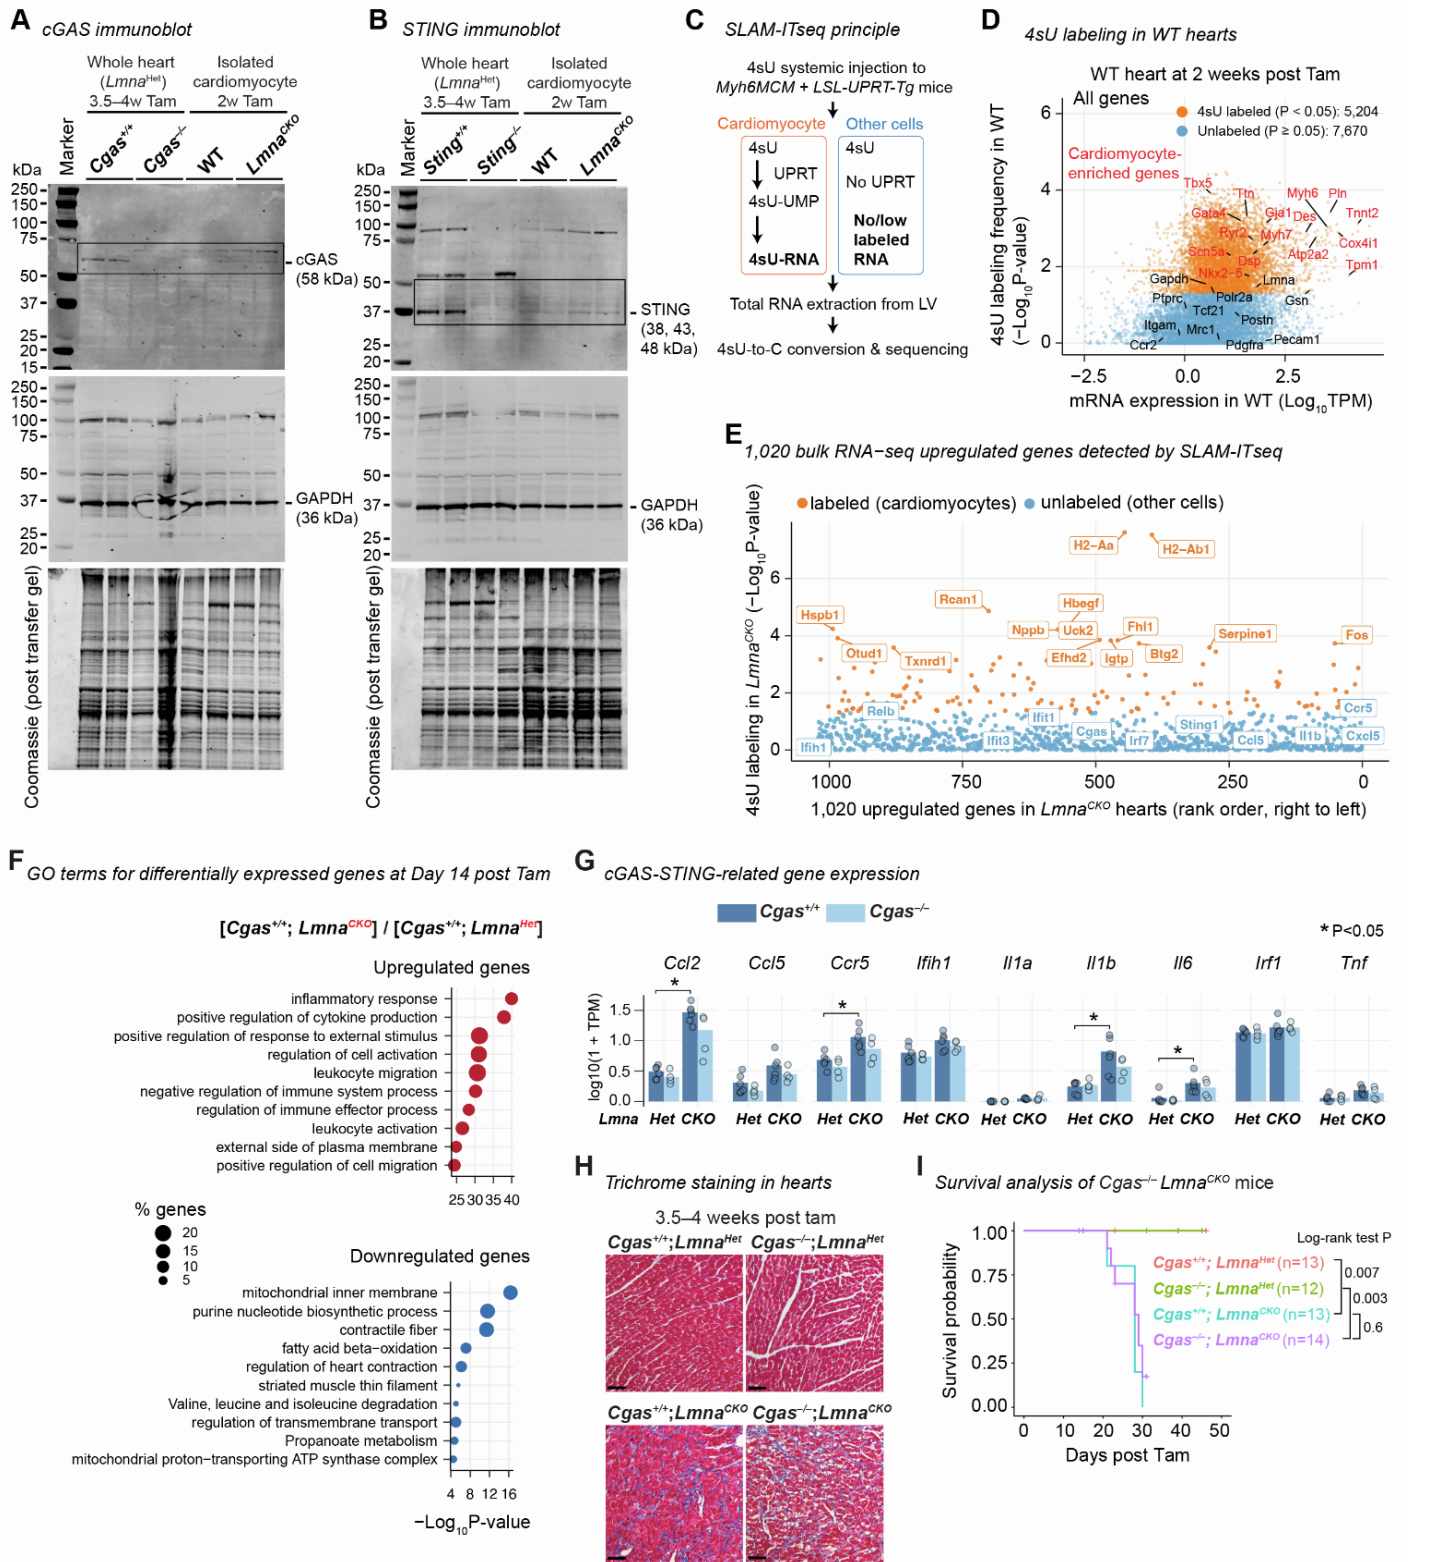

**Figure S3. Analysis of the cGAS-STING pathway in *Lmna*<sup>CKO</sup> hearts**

**A)** cGAS and GAPDH immunoblots, and Coomassie staining of original gel, in hearts and isolated cardiomyocytes, related to **Fig. 3A**.

**B)** Same as (A), but for STING.

**C)** Principle of SLAM-IT-seq. Transcripts in cardiomyocytes are labeled by 4-thiouracil (4sU).

**D)** SLAM-IT-seq data for all genes in WT hearts at 2 weeks post tamoxifen, with the expression level on the X axis and the 4sU labeling frequency on the Y axis. Select genes known to be preferentially expressed in

cardiomyocytes (red) and those not known to be preferentially expressed in cardiomyocytes (black) are indicated. P-value, beta binomial test P-value adjusted with the Benjamini-Hochberg procedure.

**E)** SLAM-IT-seq data for the 1,020 upregulated genes at 2 weeks post tamoxifen, with the rank order of the fold change of upregulation on the X axis and the 4sU labeling frequency in *Lmna*<sup>CKO</sup> hearts on the Y axis. Blue labeled gene: all upregulated cytokine genes. Highly labeled genes ( $\text{Log}_{10}$  P-value > 3.5) are also indicated (orange). P-value, same as **D**.

**F)** The top 10 Gene Ontology terms overrepresented among differentially expressed genes in *Cgas*<sup>-/-</sup>; *Lmna*<sup>Het</sup> versus *Cgas*<sup>+/+</sup>; *Lmna*<sup>Het</sup>. P-value is computed by Metascape <sup>(1)</sup>.

**G)** Normalized RNA-seq gene expressed levels for additional cGAS-STING-related genes (bar, mean). P-value, generalized linear model by DESeq2 <sup>(2)</sup>.

**H)** Masson's trichrome staining of heart sections. Scale bar: 20  $\mu\text{m}$ .

**I)** Kaplan-Meier survival analysis. P-value, log-rank test.

# SUPPLEMENTARY FIGURE S4

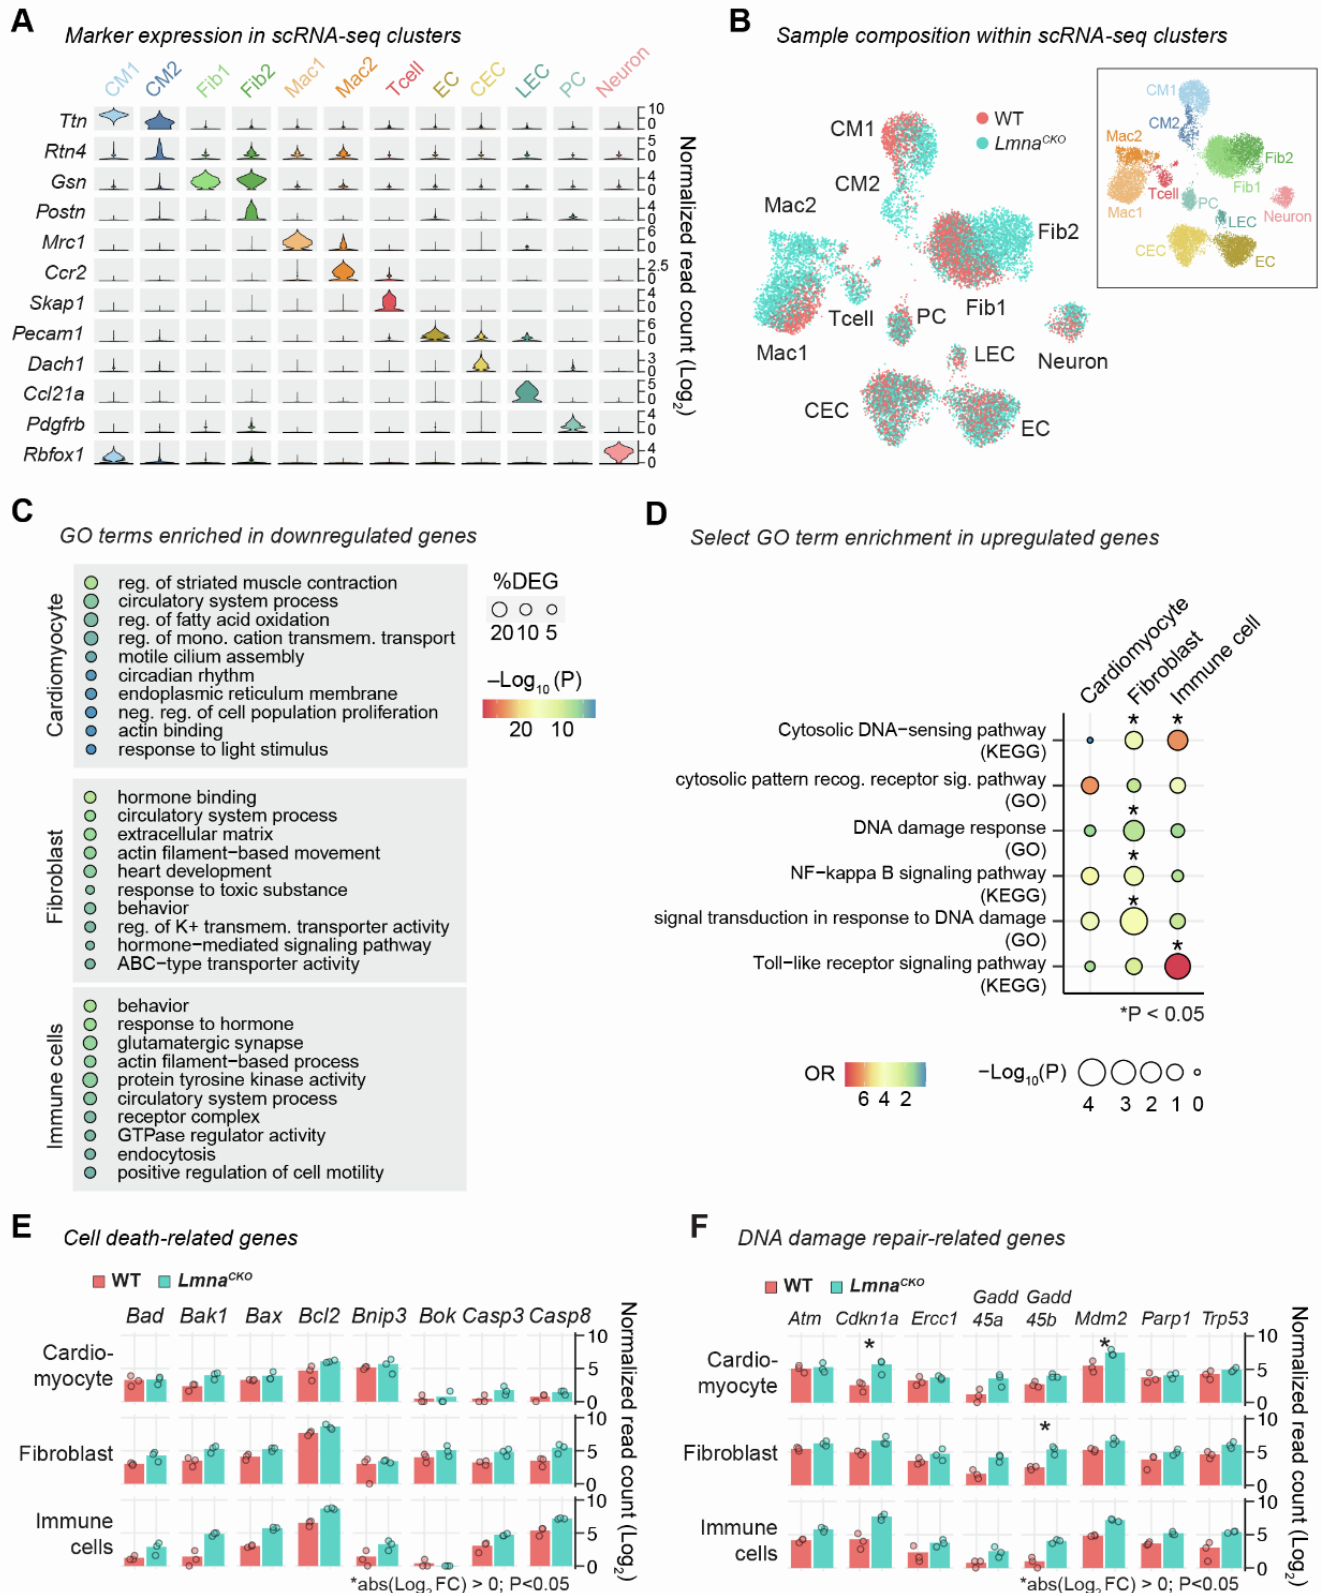

**Figure S4. Single-nucleus RNA-seq analysis of *Lmna*<sup>CKO</sup> hearts**

**A)** Expression (sum of single-nucleus normalized read count across 3 mice within cell type) of marker genes used to classify single nuclei to the cell types indicated along the Y axis, related to **Fig. 4A**.

**B)** snRNA-seq UMAP plot for 14,111 nuclei, colored by sample genotype. Inset, UMAP colored by cell type for reference.



- C)** GO terms enriched among downregulated genes within indicated cell type. P-value is computed by Metascape <sup>(1)</sup>.
- D)** Enrichment for select GO terms relevant to cytosolic DNA sensing among upregulated genes. P-value, FDR-adjusted P-value in Fisher's exact test.
- E)** Expression (mean of single-nucleus normalized read count within cell type) of cell death-related genes. Dot, mean within individual mice. Bar, mean across three mice. P-value, generalized linear model by DESeq2 <sup>(2)</sup>.
- F)** Same as (C), but for DNA damage repair-related genes.

## REFERENCES

1. Zhou, Y., Zhou, B., Pache, L., Chang, M., Khodabakhshi, A.H., Tanaseichuk, O., Benner, C., and Chanda, S.K. (2019). Metascape provides a biologist-oriented resource for the analysis of systems-level datasets. *Nat. Commun.* *10*, 1523.
2. Love, M.I., Huber, W., and Anders, S. (2014). Moderated estimation of fold change and dispersion for RNA-seq data with DESeq2. *Genome Biol.* *15*, 550.
